# Supplementary material for: Crystallization kinetics of colloidal binary mixtures with depletion attraction
Source: Royal Society of Chemistry journal article supplement (doi:10.1039/c4sm02193b), 2014-10-08
Supplement: c4sm02193b1.pdf [file c4sm02193b1.pdf]

# SUPPLEMENTARY MATERIAL

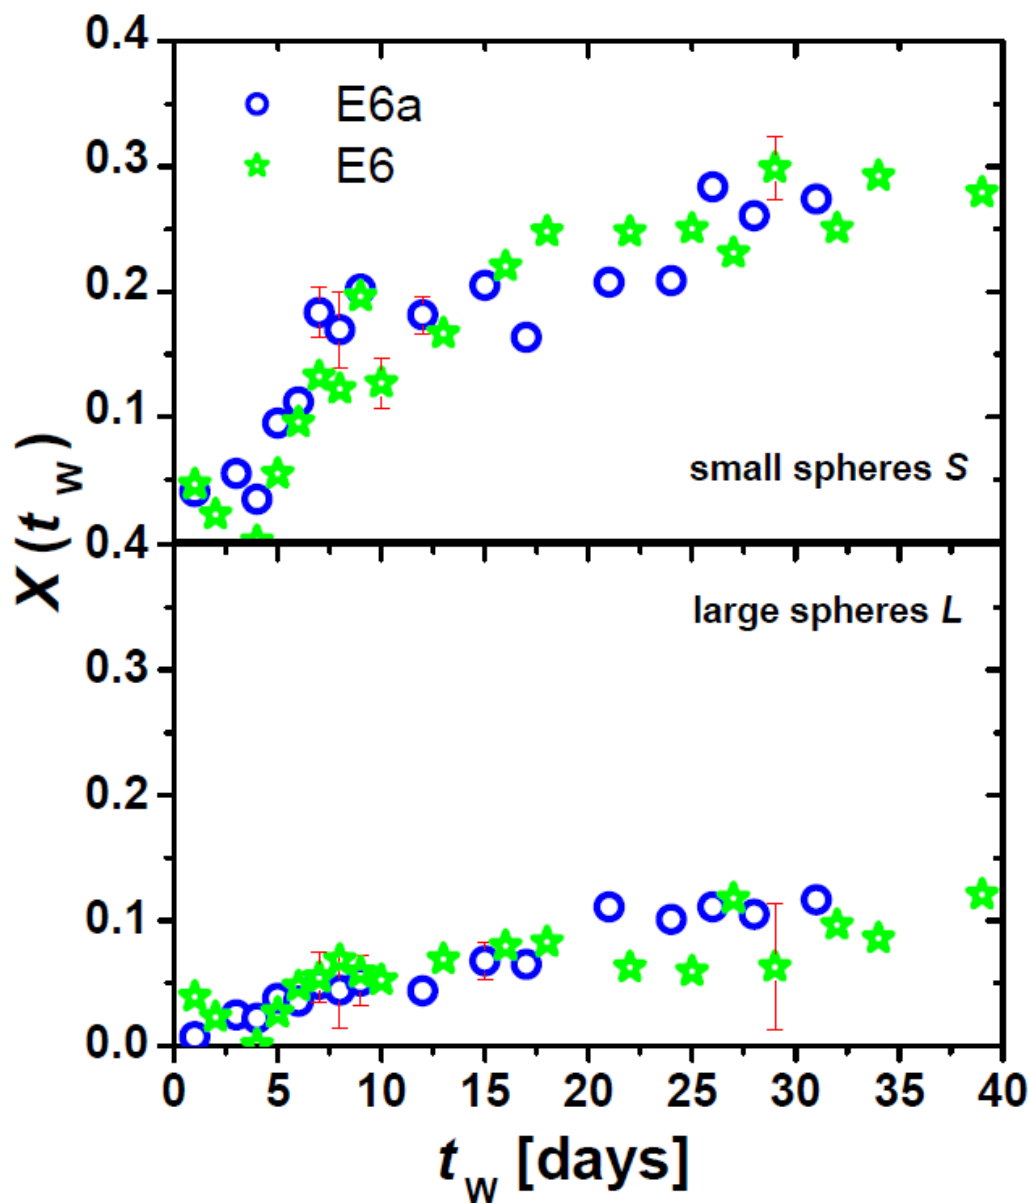

Fraction of crystals  $X(t_w)$  made of  $L$  or  $S$  spheres in the overall volume of the samples *vs* waiting time  $t_w$ , the upper plot for small and the lower plot for large spheres. The symbols for each sample are given in the legend.
